# Supplementary material for: Biomethanation of Carbon Monoxide by Hyperthermophilic Artificial Archaeal Co-Cultures
Source: MDPI journal article supplement (doi:10.3390/fermentation7040276), 2021-11-25
Supplement: s1 [file s1]

## Supplementary Materials

# **Biomethanation of Carbon Monoxide by Hyperthermophilic Artificial Archaeal Co-Cultures**

Aaron Zipperle<sup>1,†</sup>, Barbara Reischl<sup>1,2,†</sup>, Tilman Schmider<sup>1</sup>, Michael Stadlbauer<sup>1</sup>, Ivan Kushkevych<sup>3</sup>,  
Christian Pruckner<sup>1</sup>, Monika Vítězová<sup>3</sup>, Simon K.-M. R. Rittmann<sup>1,2\*</sup>

<sup>1</sup>Archaea Physiology & Biotechnology Group, Department of Functional and Evolutionary Ecology, Universität Wien, Wien, Austria

<sup>2</sup>Arkeon GmbH, Tulln an der Donau, Austria

<sup>3</sup>Department of Experimental Biology, Faculty of Science, Masaryk University, Brno, Czech Republic

<sup>†</sup>These authors contributed equally to this work.

\*Corresponding author:

Dr. Simon K.-M. R. Rittmann, Privatdoz.

Archaea Physiology & Biotechnology Group

Department of Functional and Evolutionary Ecology

Universität Wien

Althanstraße 14

1090 Wien

Austria

Tel.: +43-4277-76513

eFax.: +43-4277-876513

Email: [simon.rittmann@univie.ac.at](mailto:simon.rittmann@univie.ac.at)

**Table S1:** Chemical composition of medium A\*

| Chemical                                            | Concentration            | L <sup>-1</sup> |
|-----------------------------------------------------|--------------------------|-----------------|
| NaCl                                                |                          | 25.00 g         |
| CaCl <sub>2</sub> ·2H <sub>2</sub> O                |                          | 0.14 g          |
| MgSO <sub>4</sub> ·7H <sub>2</sub> O                |                          | 3.40 g          |
| MgCl <sub>2</sub> ·6H <sub>2</sub> O                |                          | 4.10 g          |
| KCl                                                 |                          | 0.33 g          |
| KH <sub>2</sub> HPO <sub>4</sub> ·2H <sub>2</sub> O |                          | 0.18 g          |
| NiCl <sub>2</sub> ·6H <sub>2</sub> O                |                          | 0.0005 g        |
| Na <sub>2</sub> SeO <sub>3</sub> ·5H <sub>2</sub> O |                          | 0.0005 g        |
| FeSO <sub>4</sub> ·7H <sub>2</sub> O                |                          | 0.01 g          |
| Yeast extract                                       |                          | 1.5 g           |
| S <sub>0</sub> *                                    |                          | 10.00 g         |
| 141 Trace element solution                          |                          | 10.00 mL        |
| Balch's Vitamin solution (1)                        |                          | 10.00 mL        |
| L-Cysteine-HCl·H <sub>2</sub> O                     | 0.16 mol L <sup>-1</sup> | 20 mL           |
| NaHCO <sub>3</sub>                                  | 0.6 mol L <sup>-1</sup>  | 20.00 mL        |
| Na <sub>2</sub> S·9H <sub>2</sub> O                 | 0.5 mol L <sup>-1</sup>  | 4.00 mL         |

\*S<sub>0</sub> was only augmented when *T. onnurineus* was inoculated.

**Table S2:** Chemical composition of medium B\*

| Chemical                             | Concentration            | L <sup>-1</sup> |
|--------------------------------------|--------------------------|-----------------|
| NaCl                                 |                          | 25.00 g         |
| CaCl <sub>2</sub> ·2H <sub>2</sub> O |                          | 0.40 g          |
| NH <sub>4</sub> Cl                   |                          | 0.30 g          |
| MgSO <sub>4</sub> ·7H <sub>2</sub> O |                          | 3.90 g          |
| Na <sub>2</sub> HPO <sub>4</sub>     |                          | 0.15 g          |
| Na <sub>2</sub> SiO <sub>3</sub>     |                          | 0.03 g          |
| KCl                                  |                          | 0.70 g          |
| Yeast extract                        |                          | 1.00 g          |
| S <sub>0</sub> *                     |                          | 10.00 g         |
| Holden's Trace element solution      |                          | 1.00 mL         |
| Balch's Vitamin solution (1)         |                          | 1.00 mL         |
| L-Cysteine-HCl·H <sub>2</sub> O      | 0.16 mol L <sup>-1</sup> | 20 mL           |
| NaHCO <sub>3</sub>                   | 0.6 mol L <sup>-1</sup>  | 10.00 mL        |
| Na <sub>2</sub> S·9H <sub>2</sub> O  | 0.5 mol L <sup>-1</sup>  | 4.00 mL         |

\*S<sub>0</sub> was only augmented when *T. onnurineus* was inoculated.

**Table S3:** 141 trace element solution modified from DSMZ

| Chemical                                               | L <sup>-1</sup> |
|--------------------------------------------------------|-----------------|
| Nitrilotriacetic acid                                  | 1.50 g          |
| MgSO <sub>4</sub> ·7H <sub>2</sub> O                   | 3.00 g          |
| MnCl <sub>2</sub> ·4H <sub>2</sub> O                   | 0.586 g         |
| NaCl                                                   | 1.00 g          |
| FeSO <sub>4</sub> ·7H <sub>2</sub> O                   | 0.10 g          |
| CoSO <sub>4</sub> ·7H <sub>2</sub> O                   | 0.18 g          |
| CaCl <sub>2</sub> ·2H <sub>2</sub> O                   | 0.10 g          |
| ZnSO <sub>4</sub> ·7H <sub>2</sub> O                   | 0.18 g          |
| CuSO <sub>4</sub>                                      | 0.007 g         |
| KAl(SO <sub>4</sub> ) <sub>2</sub> ·12H <sub>2</sub> O | 0.02 g          |
| H <sub>3</sub> BO <sub>3</sub>                         | 0.01 g          |
| Na <sub>2</sub> MoO <sub>4</sub> ·4H <sub>2</sub> O    | 0.01 g          |
| NiCl <sub>2</sub> ·2H <sub>2</sub> O                   | 0.03 g          |
| Na <sub>2</sub> SeO <sub>3</sub> ·5H <sub>2</sub> O    | 0.0003 g        |
| Na <sub>5</sub> WO <sub>4</sub> ·2H <sub>2</sub> O     | 0.0004 g        |

**Table S4:** Holden's trace element solution 2

| Chemical                                               | L <sup>-1</sup> |
|--------------------------------------------------------|-----------------|
| Nitrilotriacetic acid                                  | 4.5 g           |
| FeSO <sub>4</sub> ·7H <sub>2</sub> O                   | 1.54 g          |
| CuSO <sub>4</sub>                                      | 0.00627 g       |
| CoCl <sub>2</sub> ·6H <sub>2</sub> O                   | 0.005 g         |
| ZnSO <sub>4</sub> ·7H <sub>2</sub> O                   | 0.10 g          |
| MnCl <sub>2</sub> ·4H <sub>2</sub> O                   | 0.2g            |
| Na <sub>2</sub> MoO <sub>4</sub> ·4H <sub>2</sub> O    | 0.10 g          |
| KBr                                                    | 0.05 g          |
| KI                                                     | 0.05 g          |
| H <sub>3</sub> BO <sub>3</sub>                         | 0.10 g          |
| NaF                                                    | 0.05 g          |
| LiCl                                                   | 0.05 g          |
| KAl(SO <sub>4</sub> ) <sub>2</sub> ·12H <sub>2</sub> O | 0.0693 g        |
| NiCl <sub>2</sub> ·12H <sub>2</sub> O                  | 0.01 g          |
| VO <sub>2</sub> SO <sub>4</sub> ·H <sub>2</sub> O      | 0.0042 g        |
| Na <sub>5</sub> WO <sub>4</sub> ·2H <sub>2</sub> O     | 0.0059 g        |
| Na <sub>2</sub> SeO <sub>3</sub> ·5H <sub>2</sub> O    | 0.0069 g        |
| SrCl                                                   | 0.005 g         |
| BaCO <sub>3</sub>                                      | 0.0047 g        |

**Table S5:** The physiological maximal and mean values of CH<sub>4</sub> production and growth kinetics of *M. marburgensis* and *M. thermautotrophicus*

|                              | Substrate          | Turnover (max) | MER <sub>max</sub> / mmol L <sup>-1</sup> h <sup>-1</sup> | MER <sub>mean</sub> / mmol L <sup>-1</sup> h <sup>-1</sup> | qCH <sub>4,max</sub> / mmol g <sup>-1</sup> h <sup>-1</sup> | qCH <sub>4,mean</sub> / mmol g <sup>-1</sup> h <sup>-1</sup> | μ <sub>max</sub> / h <sup>-1</sup> | μ <sub>mean</sub> / h <sup>-1</sup> |
|------------------------------|--------------------|----------------|-----------------------------------------------------------|------------------------------------------------------------|-------------------------------------------------------------|--------------------------------------------------------------|------------------------------------|-------------------------------------|
| <i>M. marburgensis</i>       | H <sub>2</sub> :CO | 93.93 %        | 1.37                                                      | 0.947                                                      | 13.8                                                        | 6.12                                                         | 0.013                              | 0.004                               |
|                              | H <sub>2</sub> :CO | 30.60 %        | 0.111                                                     | 0.043                                                      | 5.53                                                        | 1.81                                                         | 0.001                              | 0.001                               |
|                              | H <sub>2</sub> :CO | 16.15 %        | 0.036                                                     | 0.007                                                      | 1.62                                                        | 0.406                                                        | 0.002                              | 0.001                               |
|                              | CO                 | -              | -                                                         | -                                                          | -                                                           | -                                                            | -                                  | -                                   |
| <i>M. thermautotrophicus</i> | H <sub>2</sub> :CO | 80.09 %        | 1.36                                                      | 0.845                                                      | 16.3                                                        | 6.59                                                         | 0.013                              | 0.005                               |
|                              | H <sub>2</sub> :CO | 30.35 %        | 0.114                                                     | 0.017                                                      | 8.79                                                        | 1.45                                                         | 0.002                              | 0.001                               |
|                              | CO                 | -              | -                                                         | -                                                          | -                                                           | -                                                            | 0.003                              | 0.000                               |

**Table S6:** HER of *T. onnurineus* after 7h of incubation\*

| Medium                     | HER / mmol L <sup>-1</sup> h <sup>-1</sup> |
|----------------------------|--------------------------------------------|
| A                          | 6.7±0.6                                    |
| B                          | 4.8±0.4                                    |
| B without vitamin solution | 4.6±1.0                                    |

\*An initial pressure of 1 barg CO was used. Values are shown with standard deviation. (N = 1, n = 3).

**Table S7:** Relative mean molar gas composition of the co-culture's headspace after a 7 h incubation period\*

| Co-culture                                | Gas                | CO<br>/ mol-% | CH <sub>4</sub><br>/ mol% | H <sub>2</sub><br>/ mol% | CO <sub>2</sub><br>/ mol% | N <sub>2</sub><br>/ mol% |
|-------------------------------------------|--------------------|---------------|---------------------------|--------------------------|---------------------------|--------------------------|
| <i>M. villosus</i> + <i>T. onnurineus</i> | CO                 | 51.4          | 10.5                      | 0.3                      | 37.8                      | 0                        |
| <i>T. onnurineus</i> + <i>M. villosus</i> | CO                 | 71.7          | 6.7                       | 0.1                      | 21.5                      | 0                        |
| <i>M. villosus</i> + <i>T. onnurineus</i> | H <sub>2</sub> :CO | 39.0          | 7.1                       | 53.8                     | 0.1                       | 0                        |
| <i>T. onnurineus</i> + <i>M. villosus</i> | H <sub>2</sub> :CO | 40.0          | 7.3                       | 52.7                     | 0.1                       | 0                        |
| <i>M. villosus</i> + <i>T. onnurineus</i> | Art. syngas        | 30.3          | 24.9                      | 5.8                      | 22.3                      | 16.7                     |
| <i>T. onnurineus</i> + <i>M. villosus</i> | Art. syngas        | 30.7          | 22.5                      | 7.1                      | 22.9                      | 16.7                     |

\*(N = 1, n = 6)

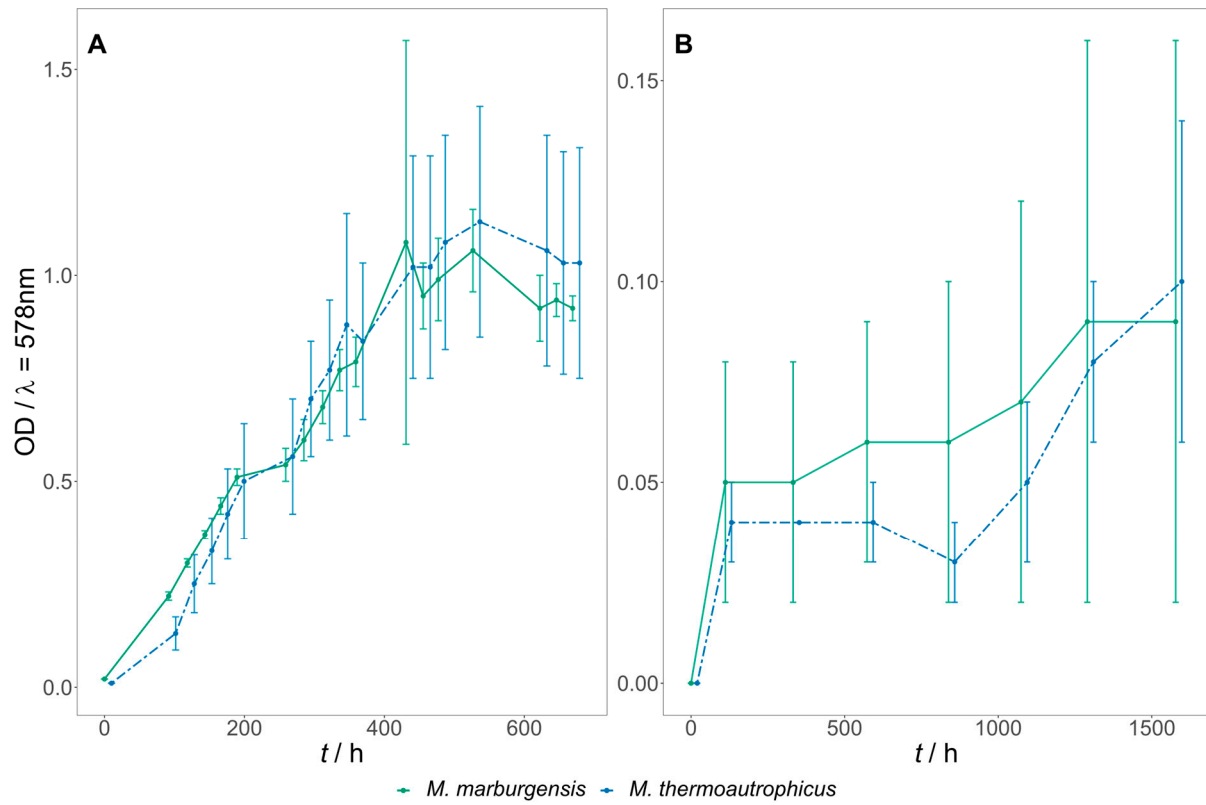

**Figure S1:** Growth of *M. marburgensis* and *M. thermoautotrophicus* in defined medium. A: growth under  $\text{H}_2:\text{CO}_2$ . B: growth under  $\text{H}_2\text{CO}$ . No growth was observed while gassing with pure CO (data not shown). Error bars show the standard deviation.

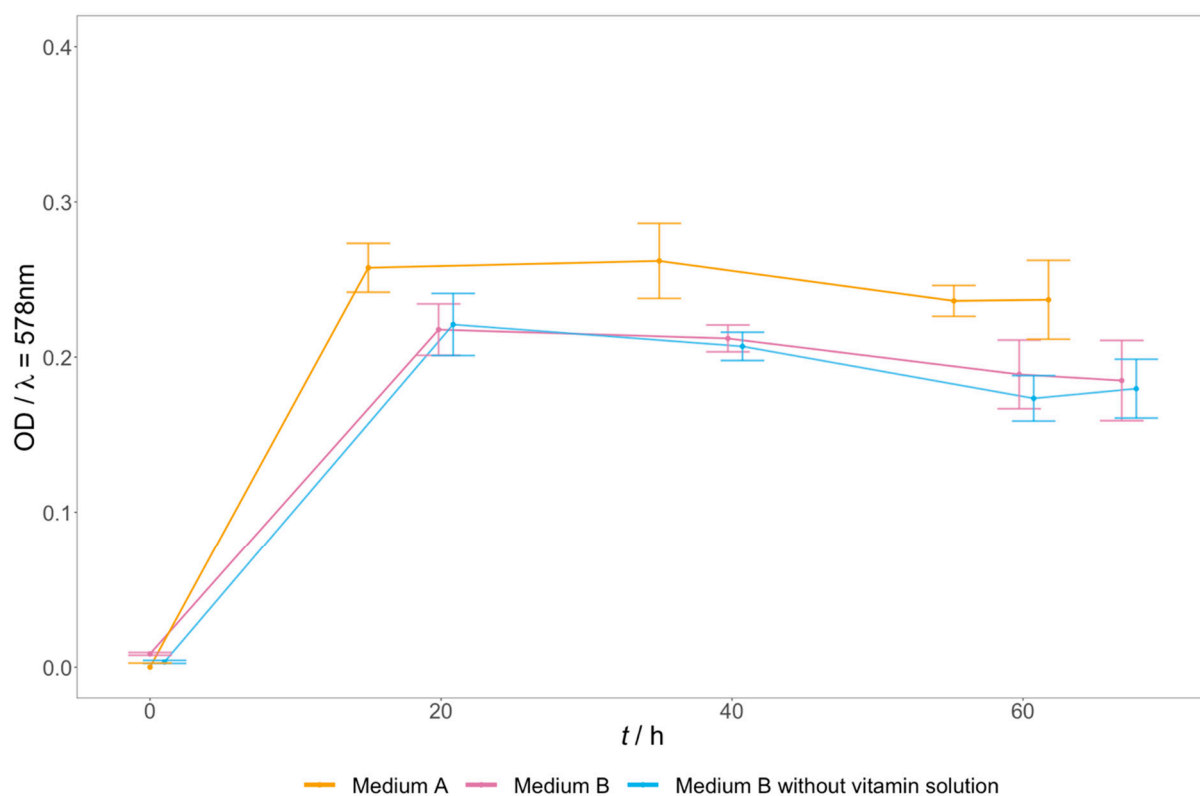

**Figure S2:** Growth of *T. onnurineus* at 1 barg CO. Error bars show the standard deviation. N = 1, n = 3.

## References

1. Balch WE, Wolfe R. New approach to the cultivation of methanogenic bacteria: 2-mercaptoethanesulfonic acid (HS-CoM)-dependent growth of *Methanobacterium ruminantium* in a pressurized atmosphere. *Appl Environ Microbiol.* 1976;32(6):781–91.
